# Supplementary material
Source: PubMed Central journal article supplement (PMC5315482)
Supplement: ismej201690x5.pdf [file ismej201690x5.pdf]

**A**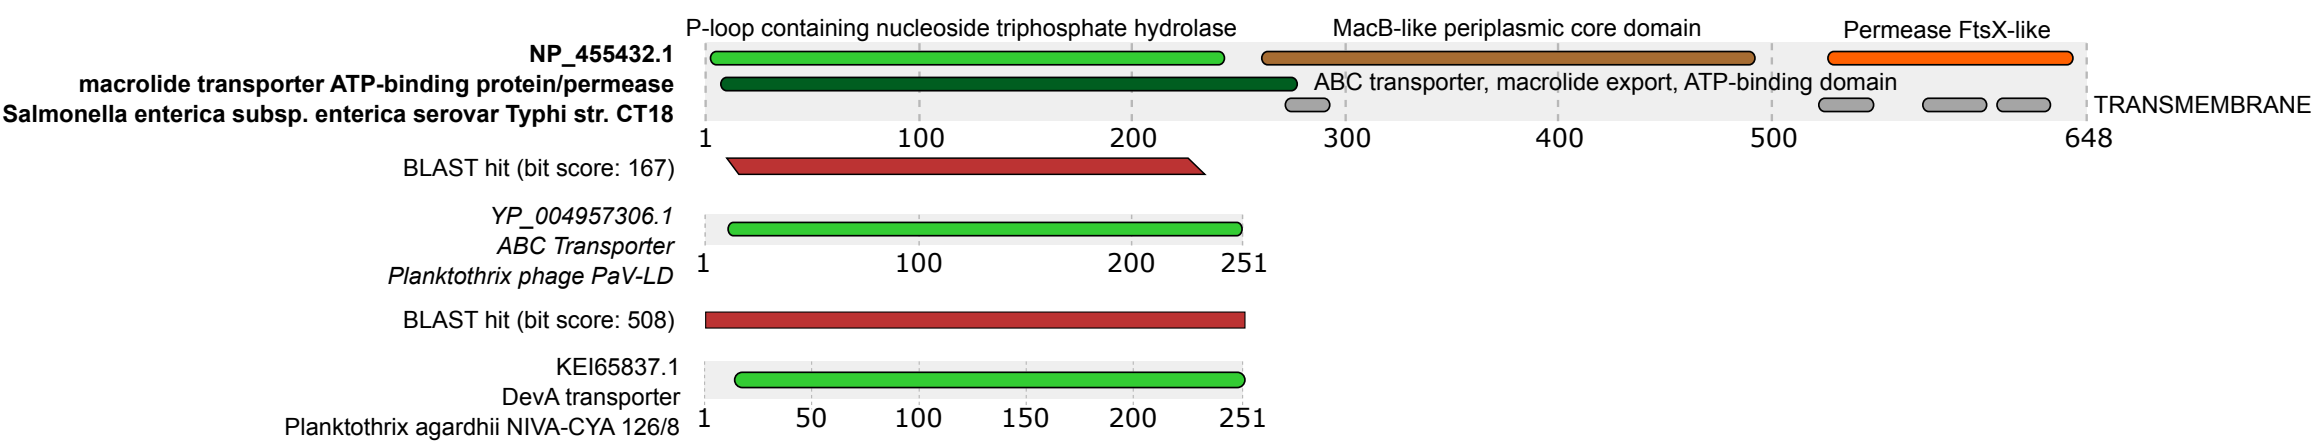**B**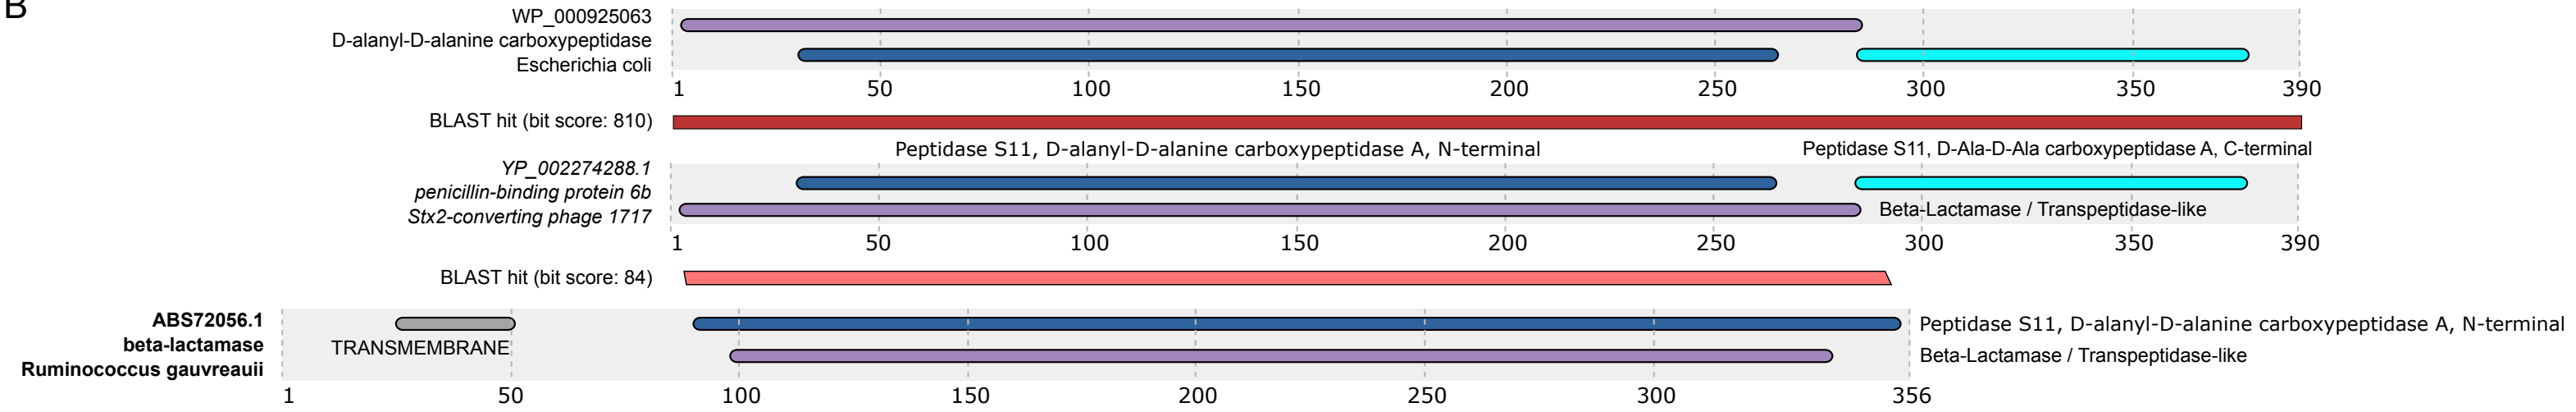**C**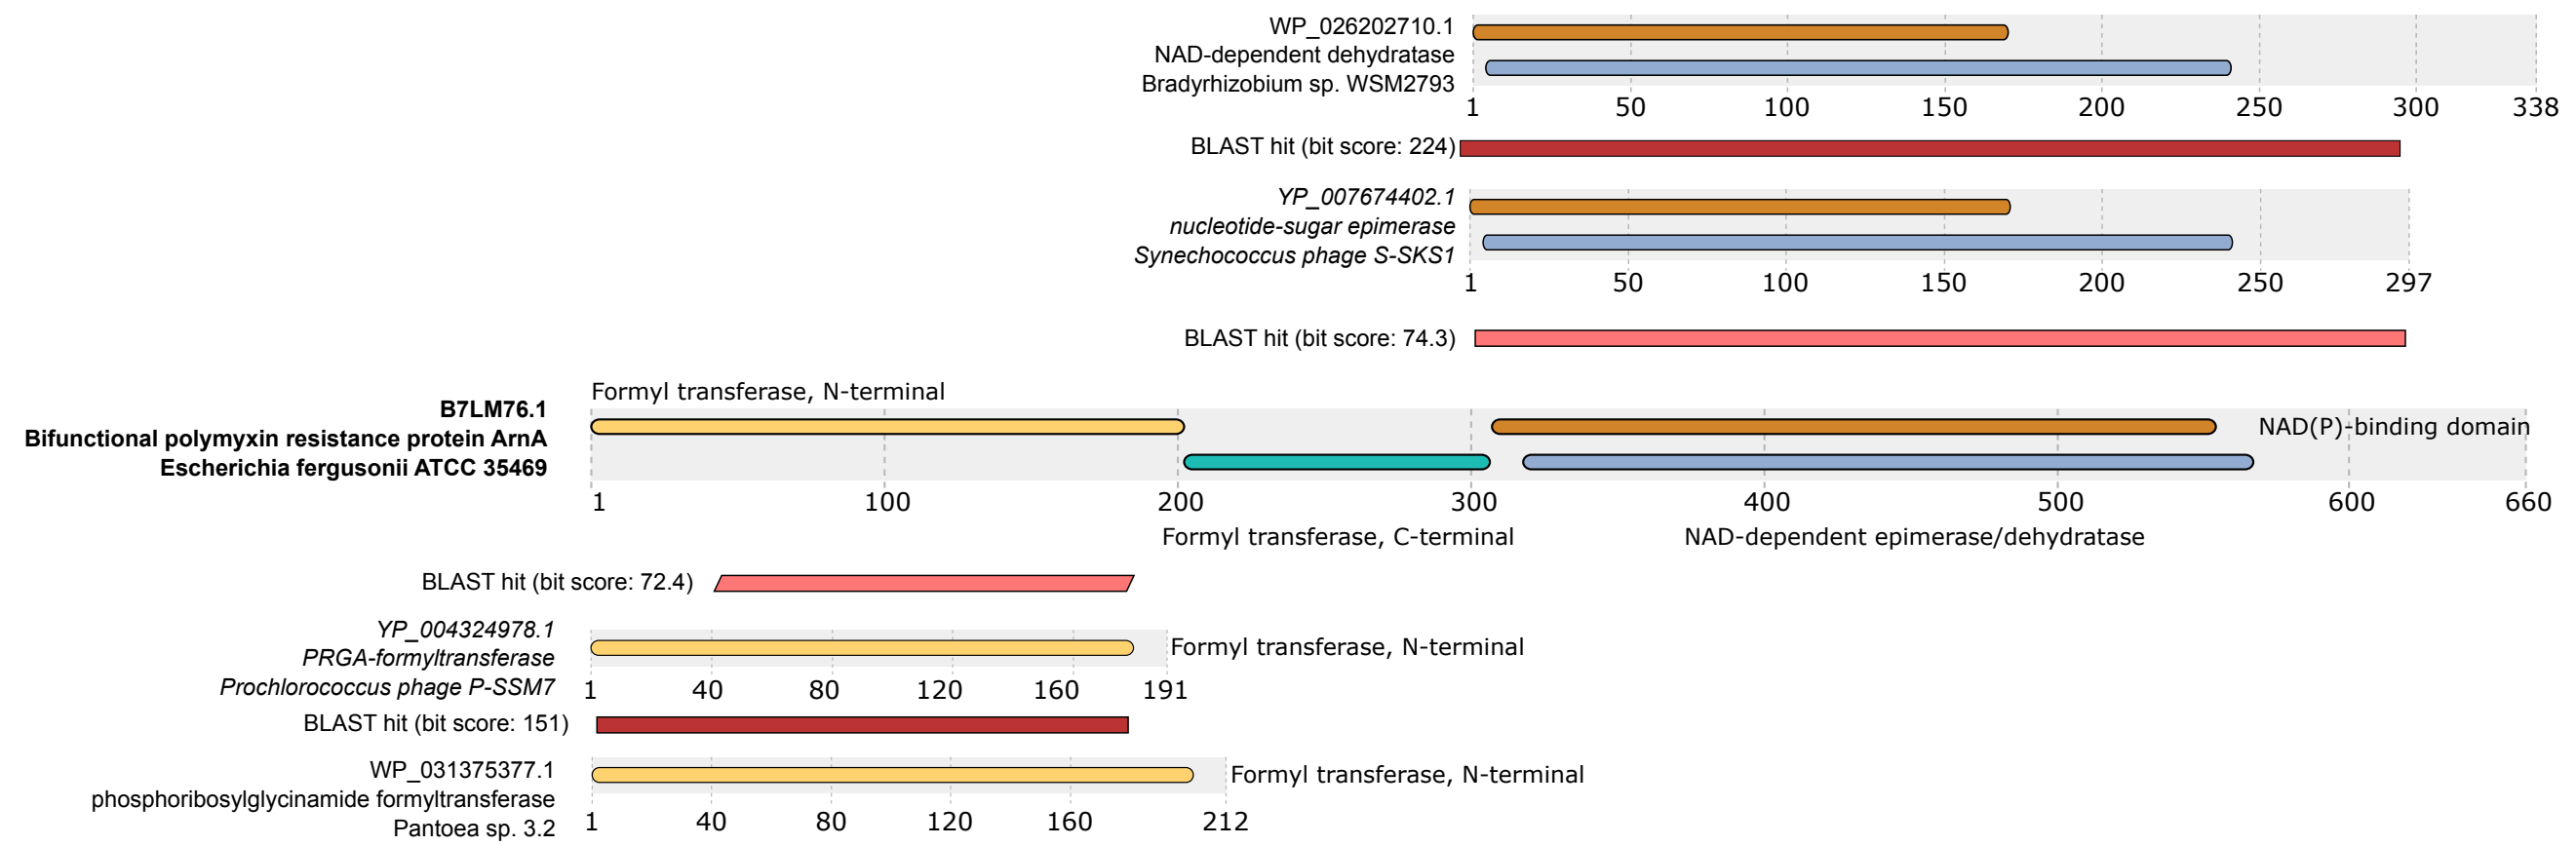

**Supplementary information S5**

Comparison of functional domain identified on antibiotic-resistance proteins (in bold), phage proteins (in italic) and bacterial proteins not identified as related to antibiotic resistance properties. Significant BLAST hit between two successive sequences are indicated in light red for bit score lower than 100 and dark red for scores greater than 100.
